# Supplementary material
Source: PubMed Central journal article supplement (PMC9255852)
Supplement: NIHMS1787094-supplement-1.pdf [file NIHMS1787094-supplement-1.pdf]

# Supplementary Information

## Table of Contents

|                                                                                          |    |
|------------------------------------------------------------------------------------------|----|
| Supplemental Table 1. Phospholipids used in study.....                                   | 2  |
| Supplemental Table 2. Liposome formulations.....                                         | 3  |
| Supplemental Table 3. Representative DLS for liposomes.....                              | 4  |
| Supplemental Figure 1. Liposomes and HPMC-C <sub>12</sub> are required for gelation..... | 5  |
| Supplemental Figure 2. Tan delta response to lipid content and liposome size.....        | 6  |
| Supplemental Figure 3. Rheological properties of cationic liposomal hydrogels.....       | 7  |
| Supplemental Figure 4. Rheological properties of PEGylated liposomal hydrogels.....      | 8  |
| Supplemental Figure 5. Effect of cholesterol on liposomal hydrogels.....                 | 9  |
| Supplemental Figure 6. Effect of lipid T <sub>m</sub> on liposomal hydrogels.....        | 10 |
| Supplemental Figure 7. Korsmeyer-Peppas fit of in vitro release data.....                | 11 |
| Supplemental Figure 8. Effect of NTA-functionalization on liposomal hydrogels.....       | 12 |
| Supplemental Figure 9. Estimated diffusivity of IgG and IL-12 in hydrogels.....          | 13 |
| Supplemental Figure 10. Tuning IL-12 release in vivo.....                                | 14 |
| Supplemental References .....                                                            | 15 |

**Supplemental Table 1.** Phospholipids used to prepare liposomes in this study, and their physicochemical characteristics. All products were obtained from Avanti Polar Lipids.

| Name               | Catalog Number | Molecular Weight (g/mol) | Net Charge (0=Neutral; +1=Positive; -1=Negative) | Melting Temperature (°C ) |
|--------------------|----------------|--------------------------|--------------------------------------------------|---------------------------|
| DSPC               | 850365C        | 790.145                  | 0                                                | 55                        |
| DSPG               | 840465P        | 801.058                  | -1                                               | 55                        |
| Cholesterol        | 700100P        | 386.65                   | 0                                                | 0                         |
| 18:1 DOPG          | 840475P        | 797.026                  | -1                                               | -18                       |
| 18:1 DOPC          | 850375C        | 786.113                  | 0                                                | -17                       |
| 14:0 DMPG          | 850345C        | 677.95                   | -1                                               | 23                        |
| 14:0 DMPC          | 850345C        | 677.95                   | 0                                                | 24                        |
| 18:1 DGS-NTA(Ni)   | 790404         | 1057.003                 | 0                                                | 0                         |
| 18:1 DGS-NTA(Co)   | 791113         | 1057.24                  | 0                                                | 0                         |
| DOPE               | 850725C        | 744.034                  | 1                                                | -16                       |
| DOPE-PEG(2000)-Cy5 | 880153C-1mg    | 3234.11                  | 1                                                | -16                       |
| POPG               | 840457C        | 770.989                  | -1                                               | -2                        |
| DMG-PEG2000        | 880151         | 2509.2                   | 0                                                | Not provided              |
| 18:1 TAP (DOTAP)   | 890890         | 698.542                  | 1                                                | 0                         |

**Supplemental Table 2.** Liposome formulations reported as mole ratios.

| Formulation               | Lipids                                  | Mole Ratio        | Where Shown                                             |
|---------------------------|-----------------------------------------|-------------------|---------------------------------------------------------|
| 1 (Standard)              | DMPC – DMPG – cholesterol               | 9 – 1 – 2         | Figures 1, 2, 3, 4, 5, 6, 7 & Supplemental Figures 1, 4 |
| 2 (Medium cholesterol)    | DMPC – DMPG – cholesterol               | 9 – 1 – 6         | Supplemental Figure 4                                   |
| 3 (High cholesterol)      | DMPC – DMPG – cholesterol               | 9 – 1 – 10        | Supplemental Figure 4                                   |
| 4 (Cationic)              | DMPC – DOTAP – cholesterol              | 9 – 1 – 2         | Supplemental Figure 2                                   |
| 5 (PEGylated)             | DMPC – DMPG – cholesterol               | 13 – 2 – 4 – 1    | Supplemental Figure 3                                   |
| 6 (Low T <sub>m</sub> )   | DOPC – DOPG – cholesterol               | 9 – 1 – 2         | Supplemental Figure 5                                   |
| 7 (High T <sub>m</sub> )  | DSPC – DSPG – cholesterol               | 9 – 1 – 2         | Supplemental Figure 5                                   |
| 8 (NTA-Ni functionalized) | DMPC – DMPG – cholesterol – DGS-NTA(Ni) | 9 – 1 – 2 – 0.379 | Figure 6 & Supplemental Figure 6                        |
| 9 (NTA-Co functionalized) | DMPC – DMPG – cholesterol – DGS-NTA(Co) | 9 – 1 – 2 – 0.379 | Figure 6                                                |

**Supplemental Table 3.** Representative Dynamic Light Scattering of 50 nm extruded liposomes. Several Acquisitions of the Same Sample.

| Item   | Diameter (nm) | Normalized Intensity (Cnt/s) | Radius (nm) | %PD  | Mw-R (kDa) | PD Index | Polydispersity (nm) |
|--------|---------------|------------------------------|-------------|------|------------|----------|---------------------|
| Acq 1  | 91.4          | 46655701                     | 45.7        | 13   | 25769      | 1.31E-01 | 6                   |
| Acq 2  | 91.5          | 47009476                     | 45.77       | 8.1  | 25859      | 8.07E-02 | 3.7                 |
| Acq 3  | 89.4          | 45015109                     | 44.72       | 10.1 | 24497      | 1.01E-01 | 4.5                 |
| Acq 4  | 89.7          | 46480861                     | 44.87       | 15.2 | 24686      | 1.52E-01 | 6.8                 |
| Acq 5  | 91.6          | 45287323                     | 45.78       | 4.2  | 25867      | 4.17E-02 | 1.9                 |
| Acq 6  | 91.1          | 46959625                     | 45.56       | 4.5  | 25586      | 4.49E-02 | 2                   |
| Acq 7  | 89.2          | 46312122                     | 44.61       | 12.5 | 24355      | 1.25E-01 | 5.6                 |
| Acq 8  | 90            | 45467863                     | 45.02       | 8.9  | 24881      | 8.92E-02 | 4                   |
| Acq 9  | 91.6          | 47301599                     | 45.81       | 13.6 | 25906      | 1.36E-01 | 6.2                 |
| Acq 10 | 88.9          | 45506154                     | 44.46       | 11   | 24164      | 1.10E-01 | 4.9                 |

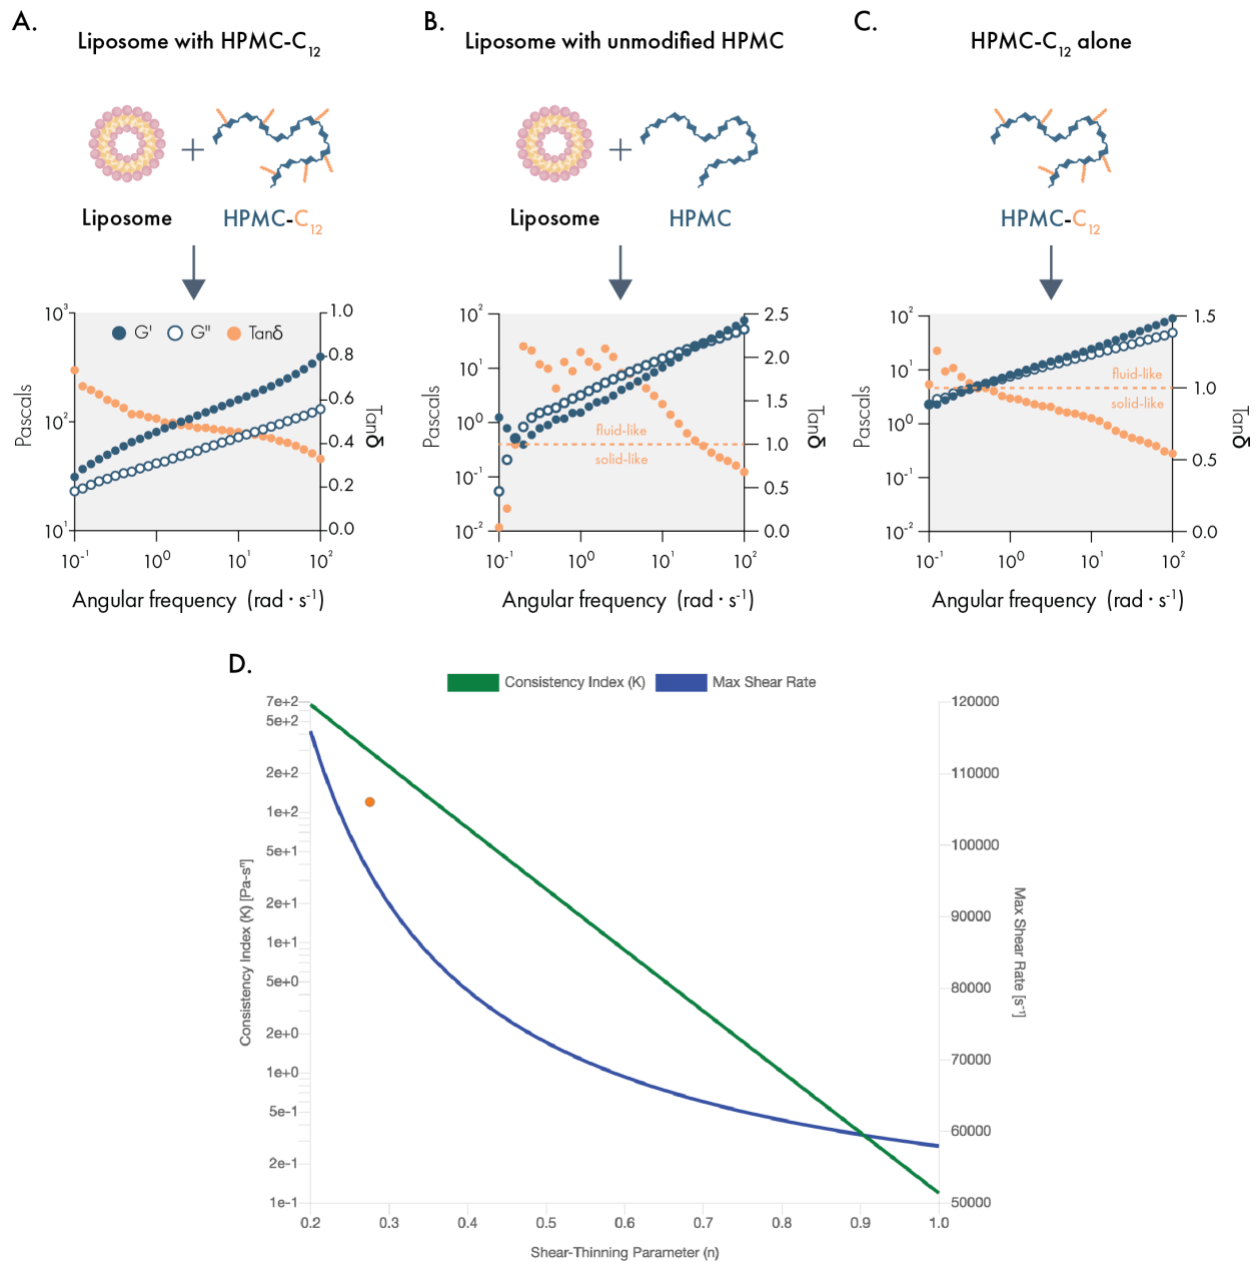

**Supplemental Figure 1.** Frequency sweep of liposomal hydrogels incorporating 2wt% hydroxypropylmethylcellulose (HPMC) with (A) and without (B) hydrophobic dodecyl (C<sub>12</sub>) modification. Both formulations were prepared with 10wt% liposome content. (C) Rheological characterization of a 2wt% solution of HPMC- C<sub>12</sub> without any liposomes. Elastic storage modulus (G') and viscous loss modulus (G'') across a wide range of frequencies on left y-axis. Tan( $\delta$ ) is shown on the right y-axis, which can be used to determine whether the material exhibits solid or fluid properties. Dotted line indicates which Tan( $\delta$ ) values indicate solid and liquid states. (D) Ashby-style plot demonstrating the injectability of LNH (formulation 2PL10, orange dot) according the Lopez et al.<sup>1</sup> The consistency index  $K$  and shear-thinning parameter  $n$  were found using a power law fit. Formulations below the green line are considered injectable by humans through 27 G needles with lengths of 24.5 mm.

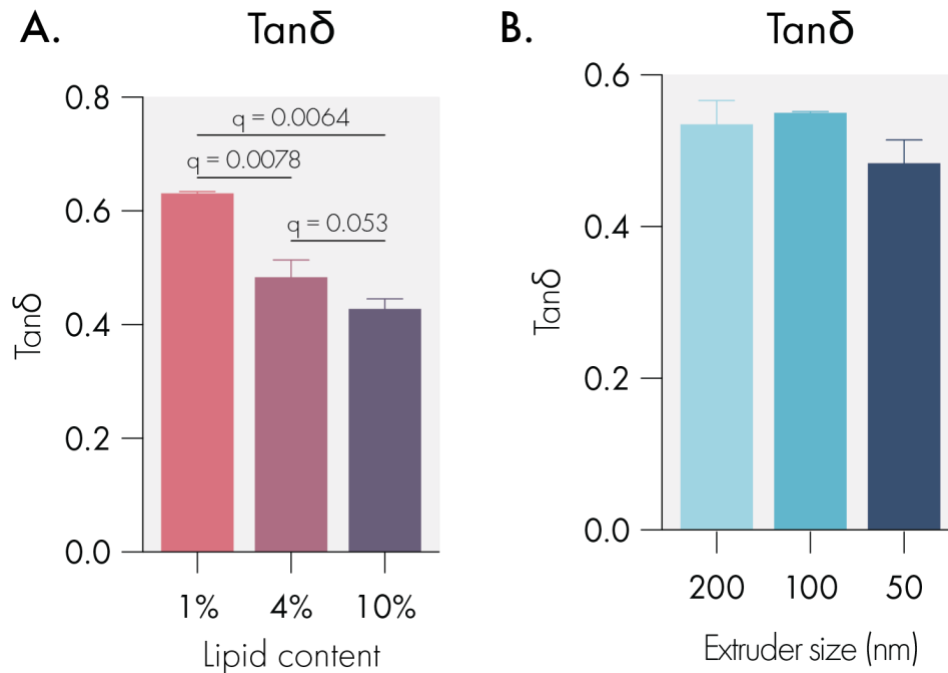

**Supplemental Figure 2.** Tan(delta) values at 10 rad/s, data represent mean and SEM of 2 replicate batches. (A) Tan(delta) varies with changes in overall lipid content of the hydrogels. (B) Tan(delta) is invariant with changing liposome size.

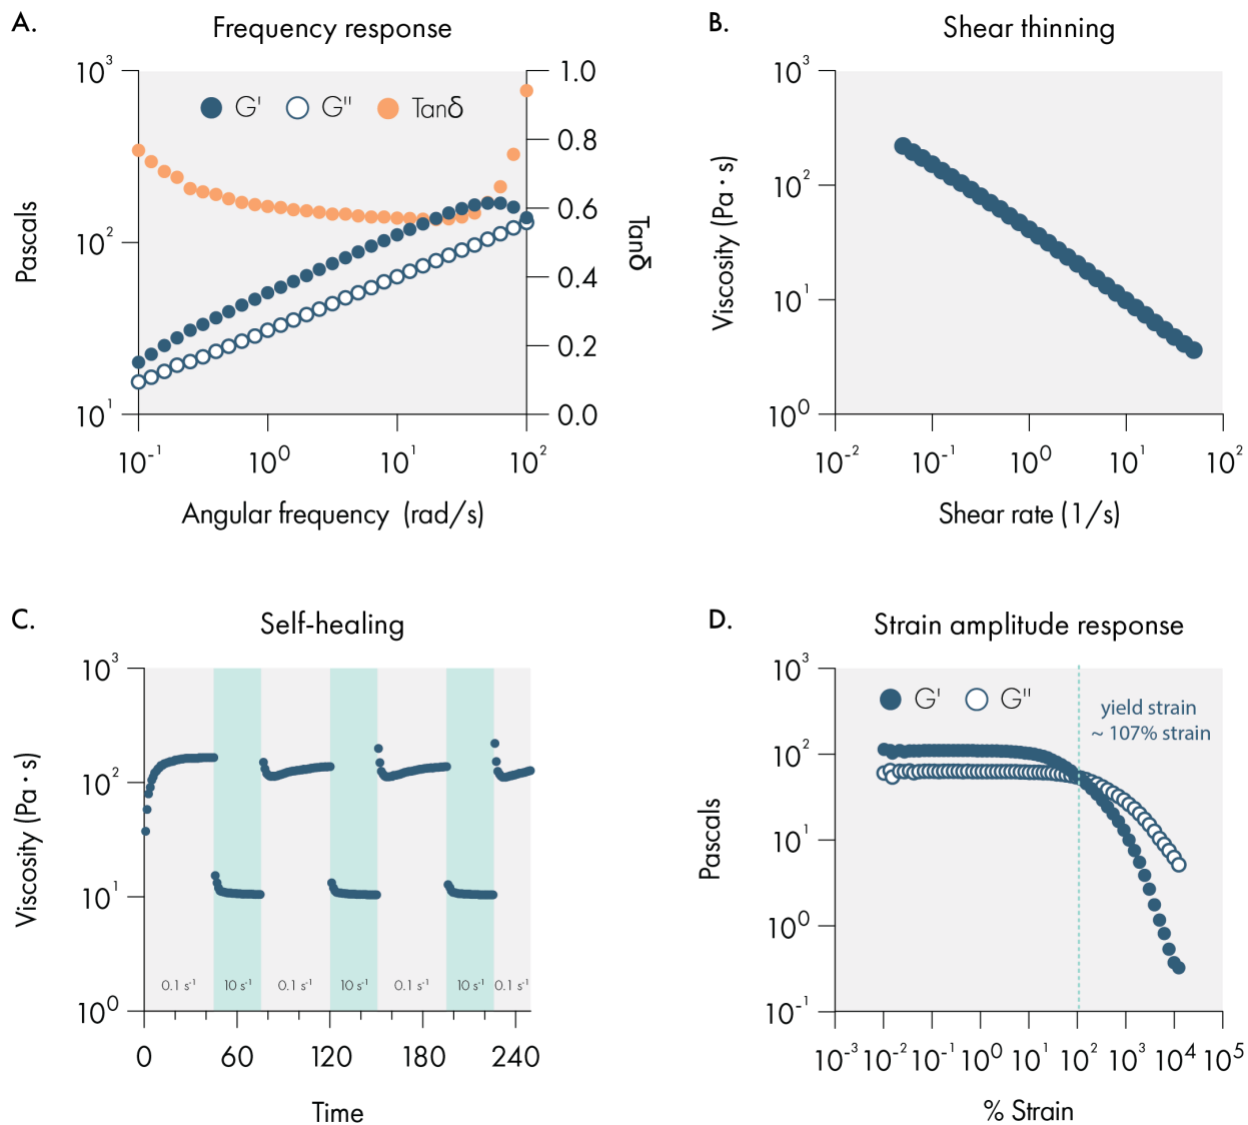

**Supplemental Figure 3.** Rheological properties of cationic liposomal hydrogels. **(A)** Frequency sweep demonstrating a gel-like response. **(B)** Flow sweep demonstrating the shear-thinning behavior. **(C)** Self-healing behavior demonstrated by cycling between a high (10 s<sup>-1</sup>) and low (0.1 s<sup>-1</sup>) shear rates with rapid recovery of the viscosity upon reduction of the shear rate. **(D)** Amplitude sweep assessing the linear viscoelastic regime and demonstrating the high % strain at yielding.

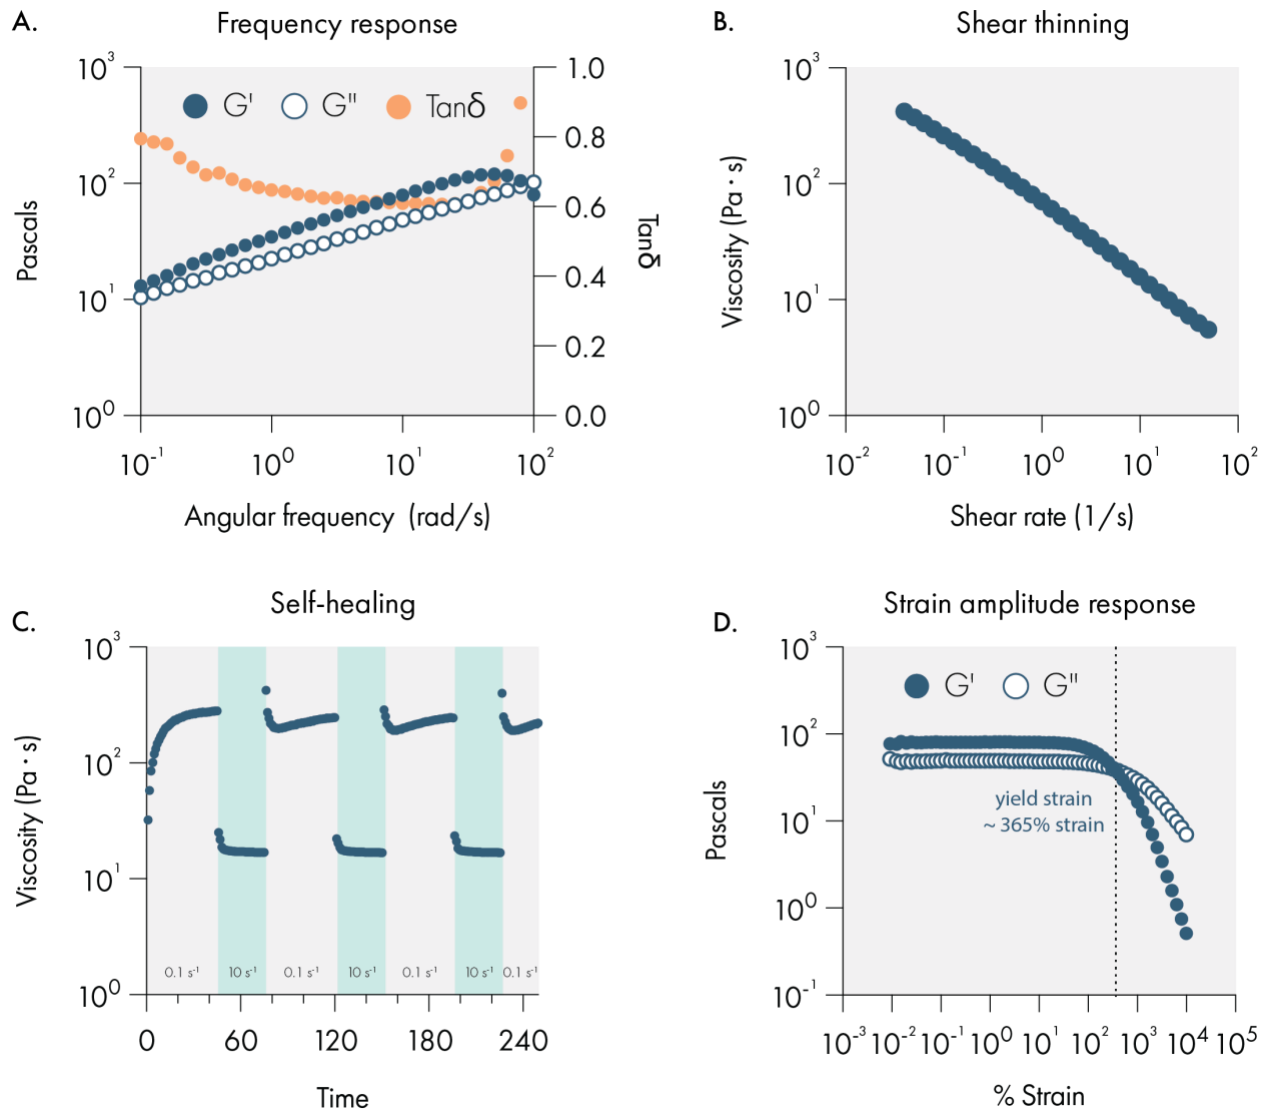

**Supplemental Figure 4.** Rheological properties of PEGylated liposomal hydrogels. **(A)** Frequency sweep demonstrating a gel-like response. **(B)** Flow sweep demonstrating the shear-thinning behavior. **(C)** Self-healing behavior demonstrated by cycling between a high ( $10 \text{ s}^{-1}$ ) and low ( $0.1 \text{ s}^{-1}$ ) shear rates with rapid recovery of the viscosity upon reduction of the shear rate. **(D)** Amplitude sweep assessing the linear viscoelastic regime and demonstrating the high % strain at yielding.



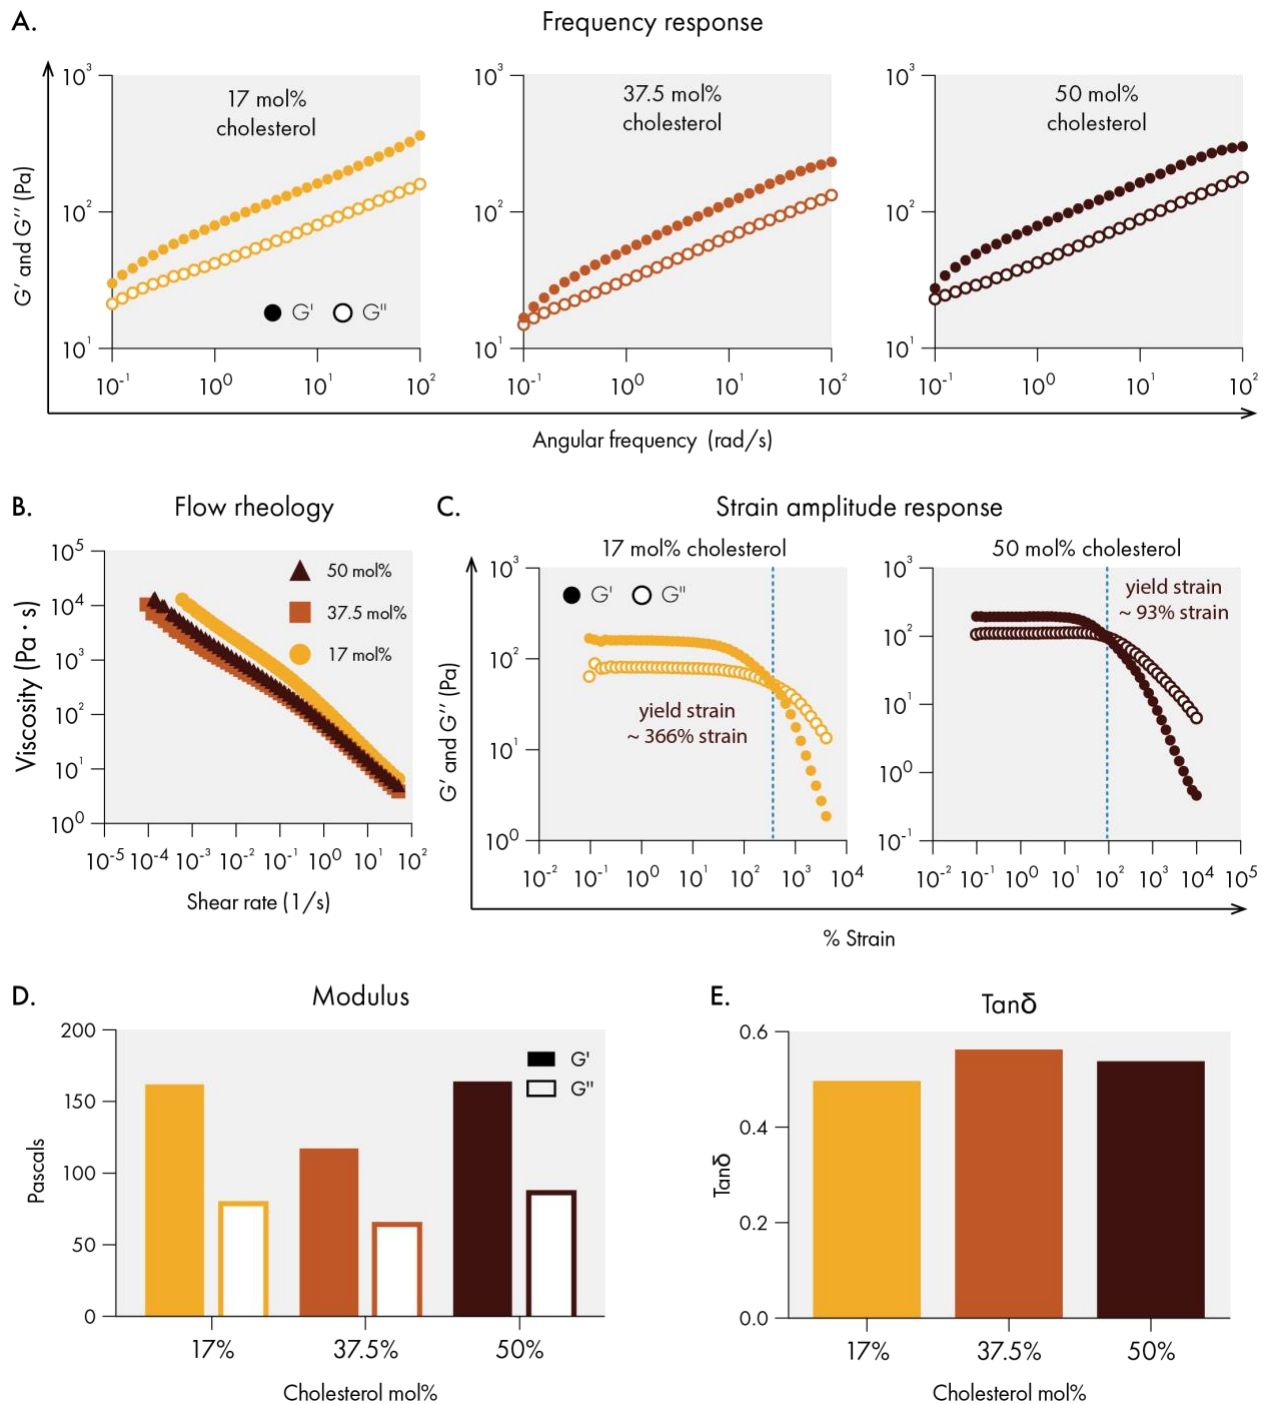

**Supplemental Figure 5.** Effect of cholesterol content on liposomal hydrogel rheological properties. **(A)** Frequency sweep demonstrating the relatively consistent gel-like response across several cholesterol mol% additions. **(B)** Flow sweep demonstrating the relatively consistent shear-thinning behavior across several cholesterol mol% additions. **(C)** Amplitude sweep assessing the linear viscoelastic regime and demonstrating the high % strain at yielding across several cholesterol mol% additions. **(D)** Elastic storage moduli ( $G'$ ) and viscous loss moduli ( $G''$ ) at 1% strain and 10 rad/s of several cholesterol mol% additions. **(E)**  $\text{Tan}(\delta)$  at 1% strain and 10 rad/s of several cholesterol mol% additions.

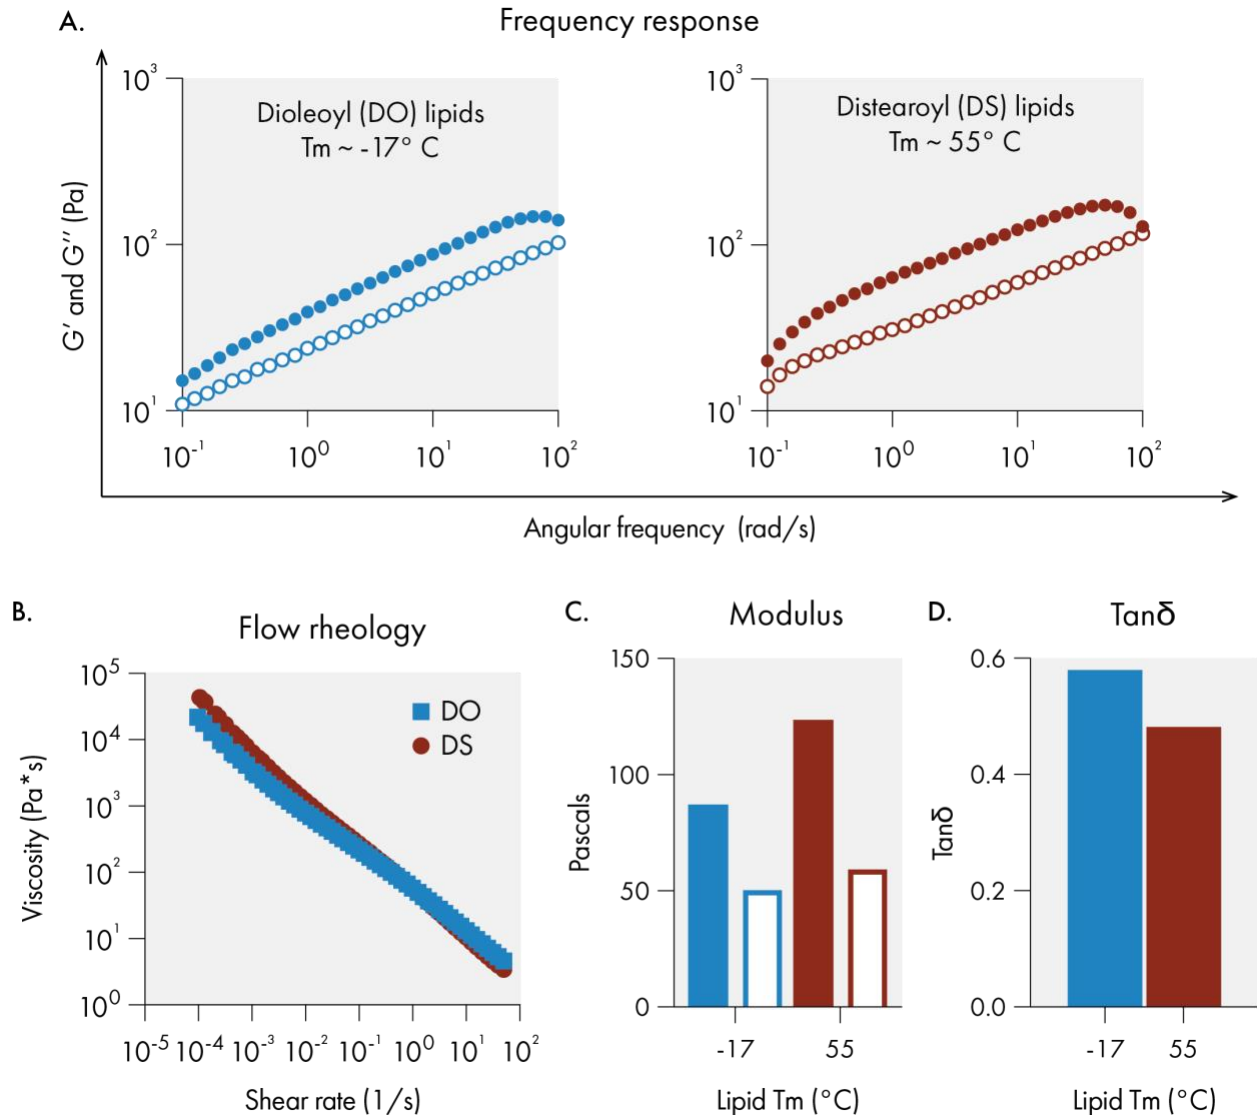

**Supplemental Figure 6.** Effect of varying the melting temperature ( $T_m$ ) of the lipids comprising the liposomes in liposomal hydrogels. Dioleoyl lipids were incorporated for a low  $T_m$ , Distearoyl lipids were incorporated for a high  $T_m$ . **(A)** Frequency sweep demonstrating the relatively consistent gel-like response regardless of  $T_m$ . **(B)** Flow sweep demonstrating the relatively consistent shear-thinning behavior regardless of  $T_m$ . **(C)** Elastic storage moduli ( $G'$ ) and viscous loss moduli ( $G''$ ) at 1% strain and 10 rad/s of liposomal hydrogels with varying  $T_m$ . **(D)**  $\text{Tan}(\delta)$  at 1% strain and 10 rad/s of liposomal hydrogels with varying  $T_m$ . All measurements were conducted at room temperature.

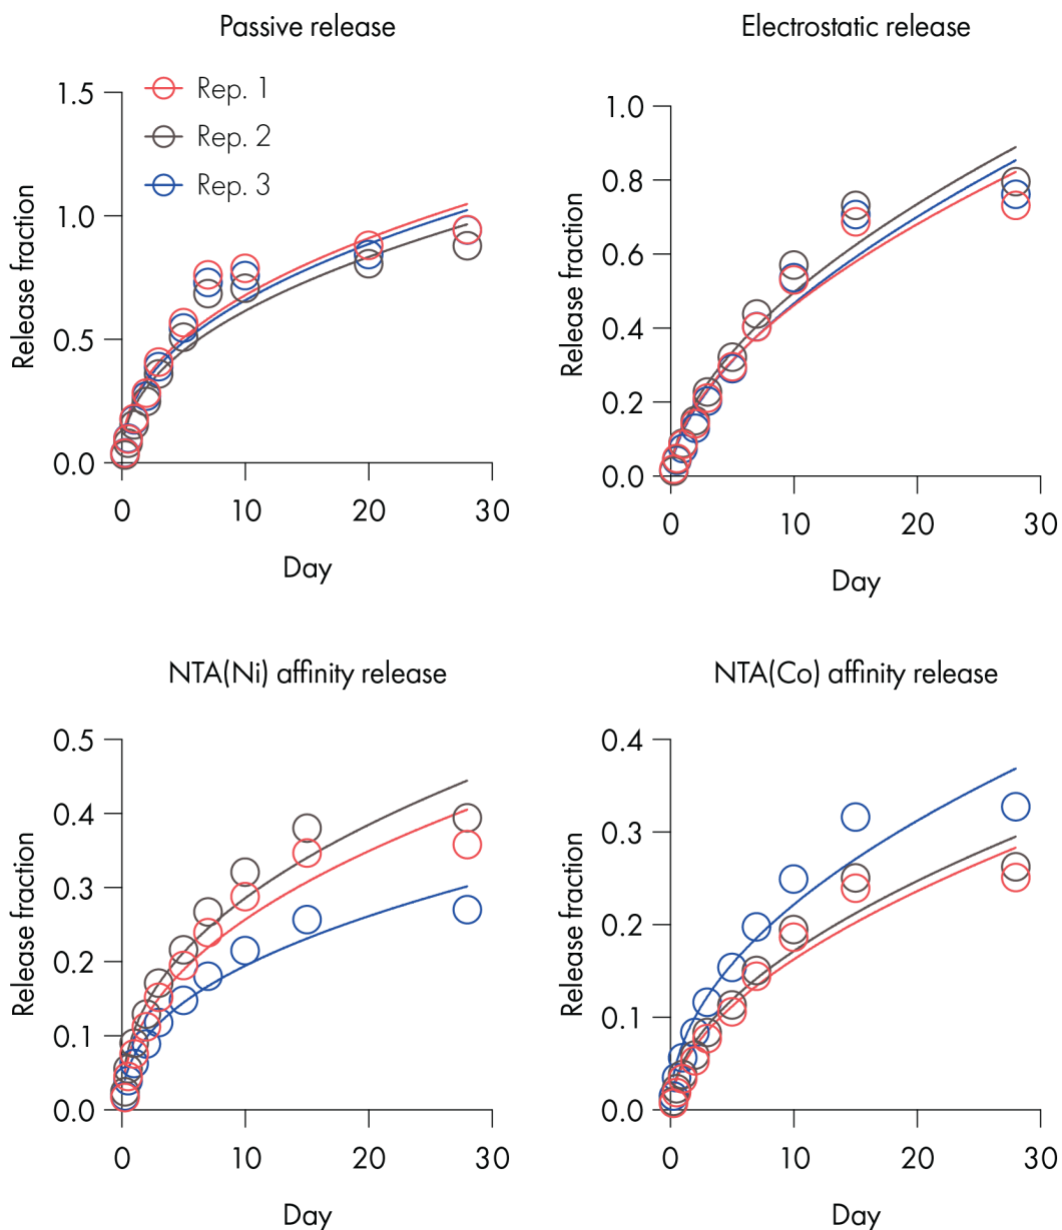

**Supplemental Figure 7.** Individual sample release curves of GFP from replicate hydrogels for several formulations of liposomal hydrogels that release cargo through different mechanisms with nonlinear Korsmeyer-Peppas fits.<sup>2</sup> Passive release is conducted with unmodified liposomes (Formulation 1 in Table 1) and GFP with no his tag. Electrostatic release is conducted with unmodified liposomes and GFP with a his tag. NTA(Ni) affinity release is conducted with hydrogels composed of 3 mol% NTA(Ni) modified liposomes (Formulation 8 in Table 1) and GFP with a his tag. NTA(Co) affinity release is conducted with hydrogels composed of 3 mol% NTA(Ni) modified liposomes (Formulation 9 in Table 1) and GFP with a his-tag.

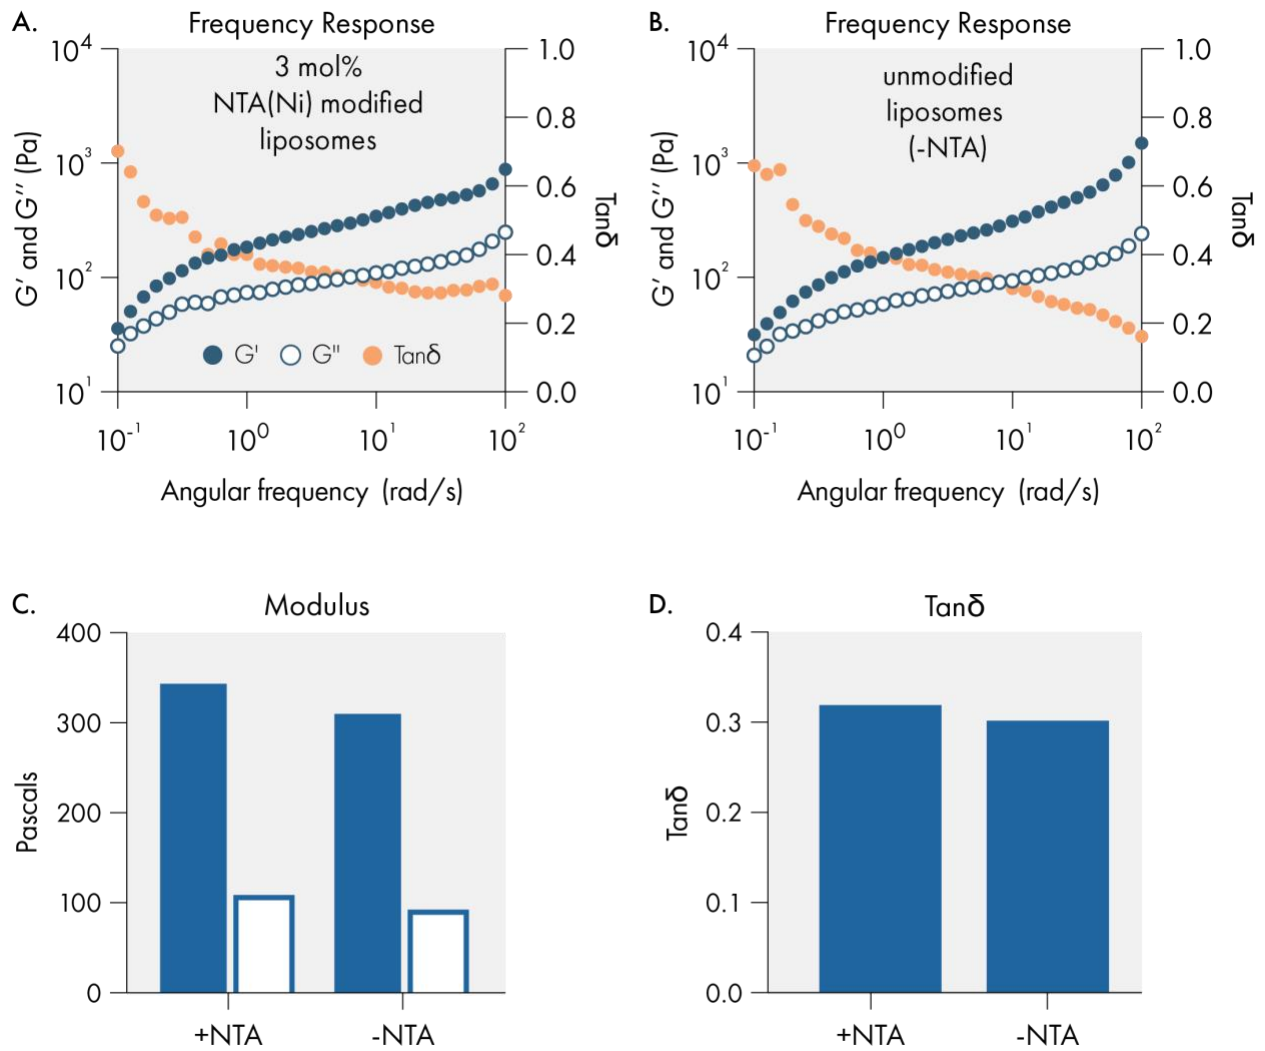

**Supplemental Figure 8.** Effect of 3 mol% NTA modified lipid incorporation on the rheological properties of liposomal hydrogels. No differences are observed. **(A)** Frequency sweep demonstrating the gel-like response. **(C)** Elastic storage moduli ( $G'$ ) and viscous loss moduli ( $G''$ ) at 1% strain and 10 rad/s of both liposomal hydrogels. **(D)**  $\text{Tan}(\delta)$  at 1% strain and 10 rad/s of both liposomal hydrogels. Both formulations were loaded with GFP to a final concentration 100  $\mu\text{g}/\text{mL}$ . Rheological measurements were conducted using 8mm serrated parallel plates.

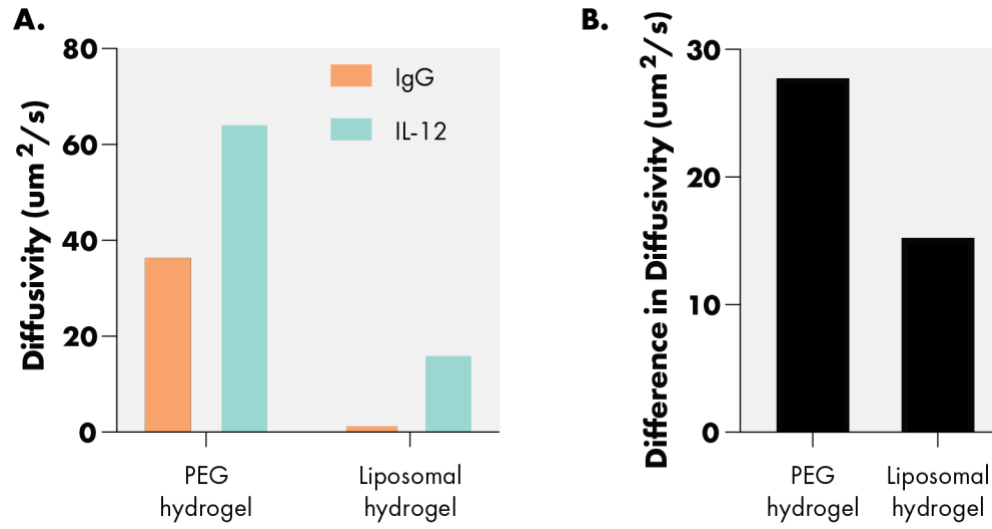

**Supplementary Figure 9.** Modeled diffusivity of IgG and IL-12 in hydrogels. **(A)** Predicted diffusivities of IgG antibodies and IL-12 cytokines in standard covalent PEG hydrogels and in liposomal hydrogels, assuming no matrix interaction with cargo (*e.g.*, passive release mechanisms).<sup>3,4</sup> **(B)** The predicted difference between the diffusivity of IL-12 and IgG antibody in each material. In the LNH IL-12 and IgG have closer diffusivity values.

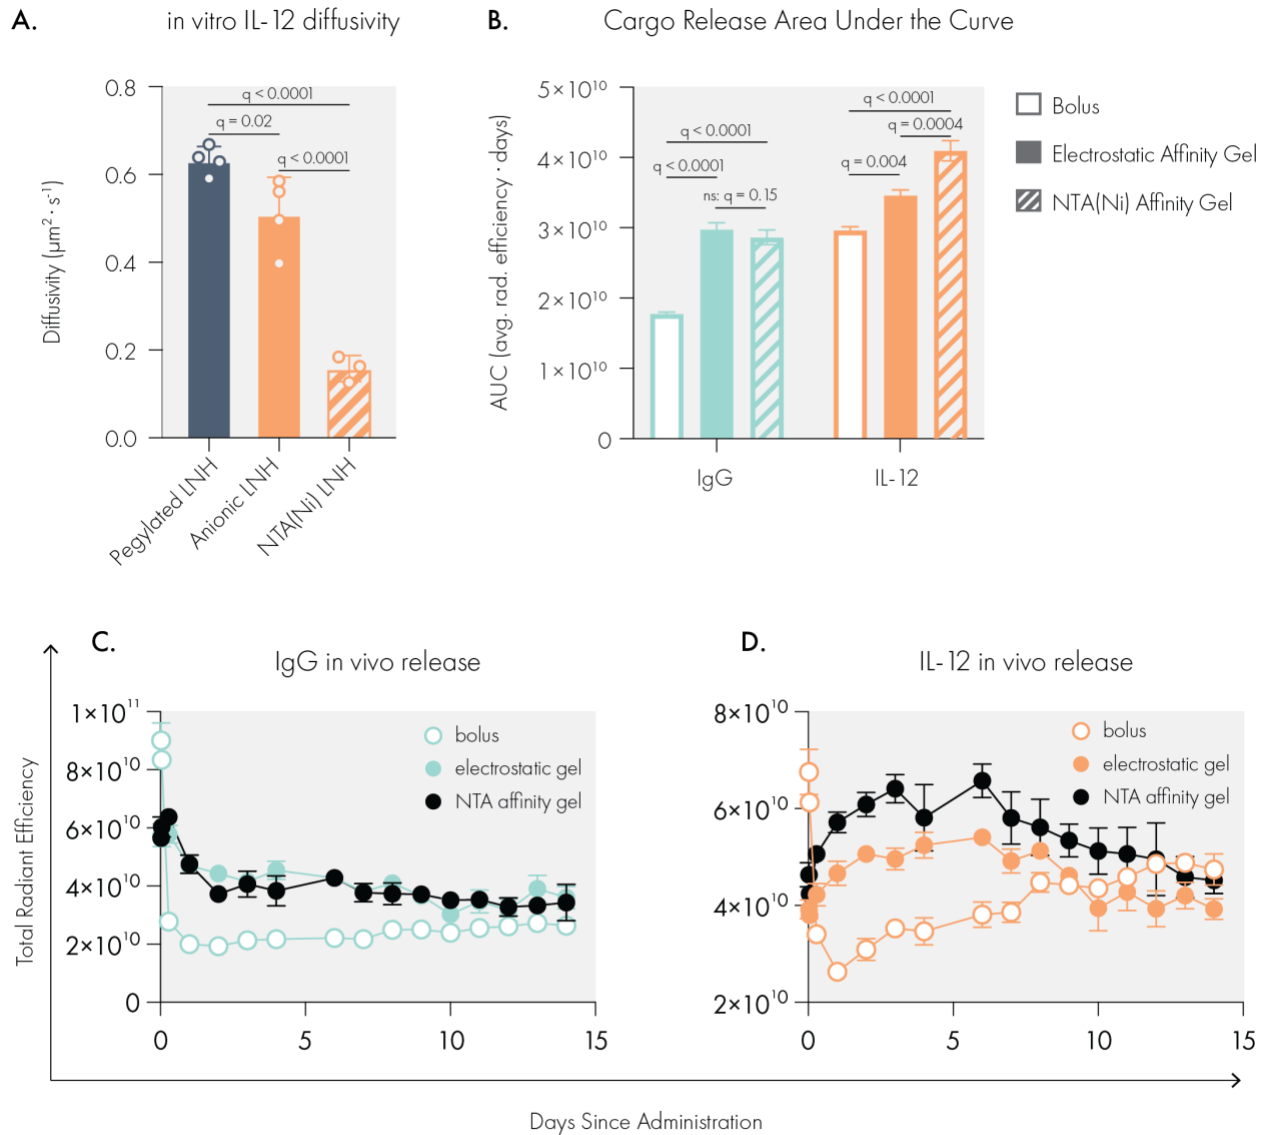

**Supplemental Figure 10.** IL-12 release *in vivo* is tuned by liposome surface chemistry. **(A)** *In vitro* preliminary analysis of IL-12 diffusion through liposomal hydrogels using FRAP. Mice were injected with liposomal hydrogels containing fluorescently labeled IgG and his-tagged IL-12. **(B)** Area under the curve was calculated for *in vivo* release data for IgG and IL-12 for each administration method. **(C)** IgG release data. **(D)** IL-12 release data.

## References

1. Lopez Hernandez, H.; Souza, J. W.; Appel, E. A. (2021). A Quantitative Description for Designing the Extrudability of Shear-Thinning Physical Hydrogels. *Macromol. Biosci.* 21 (2), 2000295.
2. Wu, I. Y.; Bala, S.; Škalko-Basnet, N.; Di Cagno, M. P. (2019). Interpreting non-linear drug diffusion data: Utilizing Korsmeyer-Peppas model to study drug release from liposomes. *Eur. J. of Pharm. Sci.* 138, 105026.
3. Axpe, E.; Chan, D.; Offeddu, G. S.; Chang, Y.; Merida, D.; Hernandez, H. L.; Appel, E. A. (2019). A multiscale model for solute diffusion in hydrogels. *Macromolecules* 52 (18), 6889.
4. Offeddu, G.; Axpe, E.; Harley, B.; Oyen, M. (2018). Relationship between permeability and diffusivity in polyethylene glycol hydrogels. *AIP Adv.* 8 (10), 105006.
